# Supplementary material for: Resting-State Functional Brain Connectivity Best Predicts the Personality Dimension of Openness to Experience
Source: PubMed Central journal article supplement (PMC6138449; doi:10.1017/pen.2018.8), 2018-07-05
Supplement: NIHMS948443-supplement-supplement_1.pdf [file NIHMS948443-supplement-supplement_1.pdf]

**Supplementary Table 1. List of HCP subjects included in the present study.**

|        |        |        |        |        |        |        |        |        |        |        |        |        |        |        |
|--------|--------|--------|--------|--------|--------|--------|--------|--------|--------|--------|--------|--------|--------|--------|
| 100206 | 100307 | 100408 | 100610 | 101006 | 101309 | 101915 | 102311 | 102513 | 102614 | 102715 | 102816 | 103010 | 103111 | 103212 |
| 103414 | 103818 | 104012 | 104416 | 105014 | 105115 | 105216 | 105620 | 105923 | 106016 | 106319 | 106521 | 106824 | 107018 | 107321 |
| 107422 | 108020 | 108222 | 108323 | 108525 | 109325 | 110007 | 110411 | 110613 | 111009 | 111211 | 111312 | 111413 | 111514 | 111716 |
| 112112 | 112314 | 112516 | 112920 | 113215 | 113316 | 113619 | 113922 | 114217 | 114318 | 114419 | 114621 | 114823 | 115017 | 115320 |
| 115724 | 115825 | 116726 | 117021 | 117122 | 117324 | 117930 | 118023 | 118124 | 118225 | 118528 | 118730 | 118831 | 118932 | 119025 |
| 119126 | 119732 | 119833 | 120111 | 120212 | 120414 | 120515 | 120717 | 121416 | 121618 | 121921 | 122317 | 122620 | 122822 | 123824 |
| 123925 | 124422 | 124826 | 125222 | 125424 | 125525 | 126325 | 126426 | 126628 | 127226 | 127327 | 127630 | 127731 | 127832 | 127933 |
| 128026 | 128127 | 128632 | 128935 | 129028 | 129129 | 129331 | 129634 | 130013 | 130114 | 130316 | 130417 | 130619 | 130720 | 130821 |
| 130922 | 131217 | 131419 | 131722 | 131823 | 132017 | 132118 | 133019 | 133625 | 133827 | 133928 | 134021 | 134223 | 134324 | 134425 |
| 134627 | 134728 | 134829 | 135124 | 135225 | 135528 | 135629 | 135730 | 135932 | 136126 | 136227 | 136631 | 136833 | 137027 | 137128 |
| 137229 | 137532 | 137633 | 137936 | 138130 | 138231 | 138332 | 138534 | 138837 | 139233 | 139637 | 139839 | 140117 | 140420 | 141422 |
| 142828 | 143224 | 143325 | 143426 | 143830 | 144125 | 144226 | 144428 | 144832 | 144933 | 145127 | 145632 | 145834 | 146129 | 146331 |
| 146432 | 146533 | 146735 | 146836 | 146937 | 147636 | 147737 | 148032 | 148133 | 148335 | 148436 | 148840 | 148941 | 149236 | 149337 |
| 149539 | 149741 | 149842 | 150423 | 150625 | 150726 | 150928 | 151425 | 151627 | 151829 | 151930 | 152225 | 152427 | 152831 | 153025 |
| 153126 | 153227 | 153429 | 153631 | 153732 | 153934 | 154229 | 154431 | 154532 | 154734 | 154835 | 154936 | 155635 | 155938 | 156031 |
| 156334 | 156435 | 156536 | 157336 | 157437 | 157942 | 158035 | 158136 | 158338 | 158540 | 158843 | 159239 | 159340 | 159441 | 159744 |
| 159946 | 160123 | 160729 | 161630 | 161731 | 162026 | 162228 | 162329 | 162733 | 162935 | 163129 | 163432 | 164030 | 164636 | 164939 |
| 165032 | 165436 | 165638 | 165840 | 165941 | 166438 | 167036 | 167238 | 167440 | 167743 | 168139 | 168341 | 168745 | 168947 | 169343 |
| 169444 | 169545 | 169747 | 169949 | 170631 | 171330 | 171633 | 172029 | 172130 | 172332 | 172433 | 172534 | 172938 | 173334 | 173435 |
| 173536 | 173637 | 173738 | 173839 | 173940 | 174437 | 174841 | 175136 | 175237 | 175338 | 175540 | 175742 | 176037 | 176441 | 176542 |
| 176744 | 176845 | 177140 | 177241 | 177645 | 177746 | 178142 | 178243 | 178748 | 178849 | 178950 | 179245 | 179346 | 180230 | 180432 |
| 180533 | 180735 | 180836 | 180937 | 181131 | 181232 | 182032 | 182739 | 182840 | 183034 | 185038 | 185139 | 185341 | 185442 | 185846 |
| 185947 | 186040 | 186141 | 186444 | 186545 | 186848 | 187143 | 187345 | 187547 | 187850 | 188145 | 188347 | 188448 | 188549 | 189349 |
| 189450 | 189652 | 190031 | 191033 | 191235 | 191336 | 191841 | 191942 | 192035 | 192237 | 192439 | 192540 | 192641 | 192843 | 193239 |
| 193845 | 194140 | 194443 | 194645 | 194746 | 194847 | 195041 | 195445 | 195647 | 195849 | 195950 | 196144 | 196346 | 196750 | 196952 |
| 197550 | 198047 | 198350 | 198451 | 198653 | 198855 | 199251 | 199352 | 199453 | 199655 | 199958 | 200008 | 200109 | 200311 | 200513 |
| 200614 | 200917 | 201111 | 201414 | 201515 | 201818 | 202113 | 202719 | 202820 | 203418 | 203923 | 204016 | 204218 | 204319 | 204420 |
| 204521 | 204622 | 205119 | 205725 | 205826 | 206222 | 206323 | 206525 | 206727 | 206828 | 206929 | 208024 | 208125 | 208226 | 208327 |
| 208630 | 209127 | 209228 | 209329 | 209935 | 210011 | 210112 | 210617 | 211114 | 211215 | 211316 | 211417 | 211619 | 211821 | 211922 |
| 212015 | 212318 | 212419 | 212823 | 213017 | 213421 | 213522 | 214019 | 214221 | 214423 | 214524 | 214625 | 214726 | 217126 | 217429 |
| 219231 | 220721 | 221319 | 224022 | 227533 | 228434 | 231928 | 237334 | 238033 | 239136 | 239944 | 245333 | 246133 | 248339 | 249947 |
| 250932 | 251833 | 255639 | 255740 | 256540 | 257542 | 257845 | 257946 | 263436 | 268749 | 268850 | 270332 | 274542 | 275645 | 280739 |
| 280941 | 281135 | 283543 | 285345 | 285446 | 286347 | 286650 | 287248 | 289555 | 290136 | 293748 | 297655 | 298455 | 299154 | 299760 |
| 300618 | 300719 | 303119 | 303624 | 304020 | 304727 | 305830 | 307127 | 308129 | 309636 | 310621 | 314225 | 316633 | 316835 | 317332 |
| 318637 | 320826 | 321323 | 322224 | 325129 | 329440 | 329844 | 330324 | 333330 | 334635 | 336841 | 339847 | 341834 | 342129 | 346945 |
| 348545 | 349244 | 350330 | 352738 | 353740 | 356948 | 358144 | 360030 | 361234 | 361941 | 365343 | 366042 | 368551 | 368753 | 371843 |
| 376247 | 377451 | 378857 | 379657 | 380036 | 381038 | 381543 | 385046 | 385450 | 386250 | 387959 | 389357 | 391748 | 392750 | 393550 |
| 394956 | 395251 | 395756 | 397154 | 397760 | 401422 | 406432 | 406836 | 412528 | 413934 | 414229 | 415837 | 419239 | 421226 | 422632 |
| 424939 | 429040 | 432332 | 436239 | 436845 | 441939 | 445543 | 448347 | 449753 | 453441 | 454140 | 456346 | 459453 | 461743 | 463040 |
| 467351 | 469961 | 475855 | 479762 | 480141 | 481042 | 481951 | 485757 | 486759 | 497865 | 499566 | 500222 | 506234 | 510326 | 512835 |
| 513130 | 513736 | 516742 | 517239 | 518746 | 519647 | 519950 | 520228 | 522434 | 523032 | 524135 | 525541 | 529549 | 529953 | 530635 |
| 531536 | 531940 | 536647 | 540436 | 541640 | 541943 | 545345 | 547046 | 548250 | 552241 | 552544 | 553344 | 555651 | 555954 | 557857 |
| 558657 | 558960 | 559053 | 559457 | 561242 | 561444 | 561949 | 562446 | 565452 | 566454 | 567052 | 567759 | 567961 | 568963 | 570243 |
| 571144 | 572045 | 573249 | 573451 | 578057 | 579665 | 579867 | 580044 | 580347 | 580650 | 580751 | 581450 | 583858 | 585256 | 585862 |
| 586460 | 587664 | 588565 | 589567 | 590047 | 592455 | 594156 | 597869 | 598568 | 599065 | 599469 | 599671 | 601127 | 604537 | 611938 |
| 613538 | 615441 | 615744 | 616645 | 617748 | 618952 | 620434 | 622236 | 623844 | 626648 | 627852 | 628248 | 634748 | 635245 | 638049 |
| 644246 | 645450 | 645551 | 647858 | 654350 | 654552 | 654754 | 656253 | 656657 | 657659 | 660951 | 663755 | 664757 | 665254 | 667056 |
| 668361 | 671855 | 672756 | 673455 | 675661 | 677766 | 679568 | 679770 | 680452 | 683256 | 685058 | 687163 | 690152 | 692964 | 693764 |
| 694362 | 695768 | 700634 | 702133 | 704238 | 705341 | 707749 | 709551 | 715041 | 715647 | 715950 | 720337 | 723141 | 724446 | 725751 |
| 727553 | 727654 | 728454 | 729254 | 729557 | 731140 | 732243 | 734045 | 737960 | 742549 | 744553 | 748258 | 749058 | 749361 | 751348 |
| 751550 | 753150 | 753251 | 756055 | 757764 | 759869 | 761957 | 763557 | 765056 | 765864 | 767464 | 769064 | 770352 | 771354 | 773257 |
| 774663 | 782561 | 783462 | 784565 | 788674 | 789373 | 792564 | 792766 | 793465 | 800941 | 802844 | 803240 | 809252 | 812746 | 814548 |
| 814649 | 815247 | 816653 | 818455 | 818859 | 820745 | 825048 | 825553 | 825654 | 826353 | 826454 | 827052 | 828862 | 832651 | 833148 |
| 835657 | 837560 | 841349 | 843151 | 844961 | 845458 | 849264 | 849971 | 852455 | 856766 | 857263 | 859671 | 861456 | 865363 | 867468 |
| 870861 | 871762 | 871964 | 872158 | 872562 | 872764 | 873968 | 877168 | 877269 | 878776 | 878877 | 880157 | 882161 | 884064 | 885975 |
| 886674 | 887373 | 888678 | 889579 | 891667 | 894067 | 894673 | 894774 | 896778 | 896879 | 898176 | 899885 | 901139 | 901442 | 902242 |
| 904044 | 905147 | 907656 | 908860 | 910241 | 910443 | 911849 | 912447 | 917255 | 917558 | 923755 | 926862 | 927359 | 930449 | 932554 |
| 933253 | 942658 | 943862 | 951457 | 952863 | 955465 | 957974 | 958976 | 959574 | 962058 | 965367 | 966975 | 969476 | 970764 | 971160 |
| 978578 | 979984 | 983773 | 984472 | 987074 | 987983 | 989987 | 990366 | 991267 | 992673 | 992774 | 993675 | 994273 | 996782 |        |

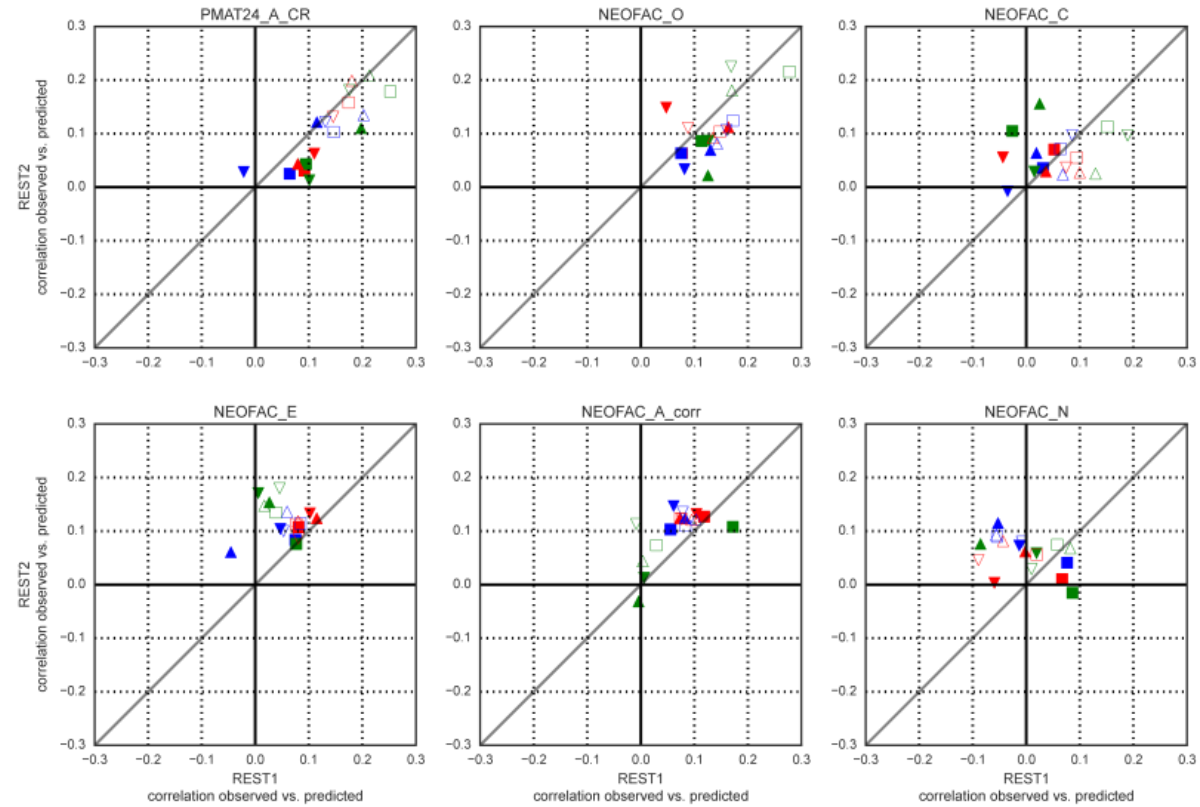

|                        |   | PMAT24_A_CR |       | NEOFAC_O |       | NEOFAC_C |       | NEOFAC_E |       | NEOFAC_A_corr |       | NEOFAC_N |       |       |
|------------------------|---|-------------|-------|----------|-------|----------|-------|----------|-------|---------------|-------|----------|-------|-------|
|                        |   | REST1       | REST2 | REST1    | REST2 | REST1    | REST2 | REST1    | REST2 | REST1         | REST2 | REST1    | REST2 |       |
| MINI / Shen 2013       | A | UNI +       | 0.09  | 0.03     | 0.08  | 0.06     | 0.05  | 0.07     | 0.08  | 0.11          | 0.12  | 0.13     | 0.07  | 0.01  |
|                        |   | UNI -       | 0.06  | 0.03     | 0.08  | 0.06     | 0.03  | 0.04     | 0.07  | 0.08          | 0.06  | 0.10     | 0.08  | 0.04  |
|                        |   | MULTI       | 0.09  | 0.04     | 0.11  | 0.09     | -0.03 | 0.10     | 0.08  | 0.08          | 0.17  | 0.11     | 0.09  | -0.02 |
|                        | B | UNI +       | 0.08  | 0.04     | 0.16  | 0.11     | 0.04  | 0.03     | 0.11  | 0.12          | 0.07  | 0.13     | -0.00 | 0.06  |
|                        |   | UNI -       | 0.12  | 0.12     | 0.13  | 0.07     | 0.02  | 0.06     | -0.05 | 0.06          | 0.08  | 0.12     | -0.05 | 0.11  |
|                        |   | MULTI       | 0.20  | 0.11     | 0.13  | 0.02     | 0.02  | 0.16     | 0.03  | 0.15          | -0.00 | -0.03    | -0.09 | 0.08  |
|                        | C | UNI +       | 0.11  | 0.06     | 0.05  | 0.15     | -0.04 | 0.06     | 0.10  | 0.13          | 0.10  | 0.13     | -0.06 | 0.00  |
|                        |   | UNI -       | -0.02 | 0.03     | 0.08  | 0.03     | -0.03 | -0.01    | 0.05  | 0.10          | 0.06  | 0.15     | -0.01 | 0.07  |
|                        |   | MULTI       | 0.10  | 0.01     | 0.13  | 0.09     | 0.01  | 0.03     | 0.01  | 0.17          | 0.01  | 0.01     | 0.02  | 0.06  |
| MSM-All / Glasser 2016 | A | UNI +       | 0.17  | 0.16     | 0.15  | 0.10     | 0.09  | 0.06     | 0.08  | 0.11          | 0.07  | 0.12     | 0.02  | 0.06  |
|                        |   | UNI -       | 0.15  | 0.10     | 0.17  | 0.12     | 0.06  | 0.07     | 0.08  | 0.11          | 0.08  | 0.11     | -0.05 | 0.09  |
|                        |   | MULTI       | 0.25  | 0.18     | 0.28  | 0.22     | 0.15  | 0.11     | 0.04  | 0.13          | 0.03  | 0.07     | 0.06  | 0.07  |
|                        | B | UNI +       | 0.18  | 0.20     | 0.13  | 0.09     | 0.10  | 0.03     | 0.08  | 0.12          | 0.10  | 0.12     | -0.04 | 0.08  |
|                        |   | UNI -       | 0.20  | 0.13     | 0.14  | 0.08     | 0.07  | 0.02     | 0.06  | 0.14          | 0.10  | 0.12     | -0.06 | 0.09  |
|                        |   | MULTI       | 0.21  | 0.21     | 0.17  | 0.18     | 0.13  | 0.03     | 0.02  | 0.15          | 0.00  | 0.04     | 0.08  | 0.07  |
|                        | C | UNI +       | 0.15  | 0.13     | 0.09  | 0.11     | 0.07  | 0.04     | 0.08  | 0.09          | 0.08  | 0.12     | -0.09 | 0.05  |
|                        |   | UNI -       | 0.13  | 0.12     | 0.16  | 0.11     | 0.09  | 0.10     | 0.05  | 0.10          | 0.08  | 0.14     | -0.01 | 0.08  |
|                        |   | MULTI       | 0.18  | 0.18     | 0.17  | 0.23     | 0.19  | 0.10     | 0.05  | 0.18          | -0.01 | 0.11     | 0.01  | 0.03  |

**Supplementary Figure 1.** Test-retest prediction results with minimal deconfounding. Only variables that are unlikely to be causally related to personality are regressed out of the scores: brain size, motion, and MB recon version.
